# Supplementary material
Source: PubMed Central journal article supplement (PMC3521843)
Supplement: NIHMS421729-supplement-supplement_1.pdf [file NIHMS421729-supplement-supplement_1.pdf]

## ONLINE SUPPLEMENT

### **AORTIC PULSE WAVE VELOCITY PREDICTS FOCAL WHITE MATTER HYPERINTENSITIES IN A BIRACIAL COHORT OF OLDER ADULTS.**

Caterina Rosano, MD, MPH<sup>a</sup>; Nora Watson, PhD<sup>a\*</sup>; YueFang Cheng, PhD<sup>b\*</sup>; Anne B. Newman, MD, MPH<sup>a</sup>; Howard J. Aizenstein, MD, PhD<sup>c</sup>; Yan Du, PhD<sup>d</sup>; Vijay Venkatraman, PhD<sup>e</sup>; Tamara B. Harris, MD, MS<sup>f</sup>; Emma Barinas-Mitchell, PhD<sup>a</sup>; Kim Sutton-Tyrrell PhD<sup>a</sup>

\*Contributed equally to preparation of manuscript.

<sup>a</sup> University of Pittsburgh, Department of Epidemiology; Pittsburgh, PA

<sup>b</sup> University of Pittsburgh, Department of Neurological Surgery; Pittsburgh, PA

<sup>c</sup> University of Pittsburgh, Department of Psychiatry; Pittsburgh, PA

<sup>f</sup> National Institute on Aging, Laboratory of Epidemiology, Demography, and Biometry;  
Bethesda, MD

Corresponding Author:

Caterina Rosano, MD, MPH

130 N. Bellefield Ave

Room 507

Pittsburgh, PA 15213

Phone: 412-383-1294

Fax: 412-383-1308

Email: [rosanoc@edc.pitt.edu](mailto:rosanoc@edc.pitt.edu)

## **Methods**

### **Study Population**

The cohort was followed prospectively to evaluate the relationship of changes in body composition, weight, and related health conditions to incident mobility disability. The cohort consisted of 3,075 well-functioning older black and white men and women living in Pittsburgh, PA and Memphis, TN<sup>1</sup>. Eligible participants were 70-79 years of age and reported no difficulty walking a quarter of a mile (400 m), climbing 10 steps, or performing activities of daily living<sup>1</sup>.

### **Pulse Wave Velocity**

A minimum of ten beats were recorded for each simultaneous recording run. Three separate runs were recorded for each participant, and all usable runs were averaged to calculate the final PWV measure. The distance between the carotid and femoral recording sites was measured above the surface of the body with a tape measure. The distance was divided by the time delay between the foot of the pressure waves at each site to calculate PWV in cm/s.<sup>2</sup>

### **Magnetic Resonance Image Acquisition**

The magnetization-prepared rapid gradient echo T1-weighted images and fluid-attenuated inversion recovery images were acquired in the axial plane. Diffusion Weighted Images were acquired using single-short spin-echo sequence.<sup>3-5</sup>

White matter hyperintensities volume was obtained from T2-weighted FLAIR image using an automated method and normalized for brain volume<sup>4,6</sup>. FA was obtained from Diffusion weighted images<sup>7</sup>, using previously published processing steps<sup>3-5</sup>. Using the segmentation of white matter, gray matter, and WMH that were obtained from the T1-weighted and T2-weighted FLAIR images, the FA maps were restricted to normal appearing white matter.

The spatial distribution of white matter tracts was obtained using the JHU atlas<sup>8</sup>. Volume of the gray matter was calculated by segmenting the skull-stripped T1-weighted image in native anatomical space using the FAST - FMRIB's Automated Segmentation Tool<sup>9</sup>. Intracranial volume was measured using a T1-weighted image, BET with advanced option (-A) to extract additional skull and scalp surfaces<sup>10</sup>.

## References

1. Simonsick EM, Newman AB, Nevitt MC, Kritchevsky SB, Ferrucci L, Guralnik JM, Harris T. Measuring higher level physical function in well-functioning older adults: Expanding familiar approaches in the health abc study. *J Gerontol A Biol Sci Med Sci*. 2001;56:M644-649
2. Sutton-Tyrrell K, Najjar SS, Boudreau RM, Venkitachalam L, Kupelian V, Simonsick EM, Havlik R, Lakatta EG, Spurgeon H, Kritchevsky S, Pahor M, Bauer D, Newman A. Elevated aortic pulse wave velocity, a marker of arterial stiffness, predicts cardiovascular events in well-functioning older adults. *Circulation*. 2005;111:3384-3390
3. Venkatraman VK, Aizenstein HJ, Newman AB, Yaffe K, Harris T, Kritchevsky S, Ayonayon HN, Rosano C. Lower digit symbol substitution score in the oldest old is related to magnetization transfer and diffusion tensor imaging of the white matter. *Front Aging Neurosci*. 2011;3:11.doi: 10.3389/fnagi.2011.00011
4. Rosano C, Bennett DA, A BN, Venkatraman V, Yaffe K, Harris T, Kritchevsky S, H JA. Patterns of focal gray matter atrophy are associated with bradykinesia and gait disturbances in older adults. *J Gerontol A Biol Sci Med Sci*. 2012;doi: 10.1093/gerona/qlr262. *In press*
5. Rosano C, Aizenstein HJ, Newman AB, Venkatraman V, Harris T, Ding J, Satterfield S, Yaffe K, Study ftHA. Neuroimaging differences between older adults with maintained versus declining cognition over a 10-year period. *Neuroimage*. 2012;62:307-313
6. Wu M, Rosano C, Butters M, Whyte E, Nable M, Crooks R, Meltzer CC, Reynolds CF, 3rd, Aizenstein HJ. A fully automated method for quantifying and localizing white matter hyperintensities on mr images. *Psychiatry Res*. 2006;148:133-142
7. Le Bihan D, Breton E, Lallemand D, Grenier P, Cabanis E, Laval-Jeantet M. Mr imaging of intravoxel incoherent motions: Application to diffusion and perfusion in neurologic disorders. *Radiology*. 1986;161:401-407
8. Mori S, Oishi K, Jiang H, Jiang L, Li X, Akhter K, Hua K, Faria AV, Mahmood A, Woods R, Toga AW, Pike GB, Neto PR, Evans A, Zhang J, Huang H, Miller MI, van Zijl P, Mazziotta J. Stereotaxic white matter atlas based on diffusion tensor imaging in an icbm template. *Neuroimage*. 2008;40:570-582
9. Zhang Y, Brady M, Smith S. Segmentation of brain mr images through a hidden markov random field model and the expectation maximization algorithm. *IEEE Trans Med Imaging*. 2001;20:45-57
10. Jenkinson M, Pechaud M, Smith S. BET2: MR-based estimation of brain, skull and scalp surfaces. *Eleventh Annual Meeting of the Organization for Human Brain Mapping*. 2005

Table S1. Population characteristics of this study cohort (n=303) measured at study entry in 1997-98 and concurrent with the MRI in 2006-08. Means and standard deviations (SD) are reported, unless otherwise noted.

| <b>Population Characteristics</b> | <b>Study entry</b> | <b>Time of MRI</b> |
|-----------------------------------|--------------------|--------------------|
| PWV, cm/sec                       | 840.31 (412.68)    |                    |
| BMI, m/kg <sup>2</sup>            | 27.21 (4.54)       | 27.27 (4.48)       |
| SBP, mmHg                         | 137.08 (20.12)     | 135.14 (18.32)     |
| DBP, mmHg                         | 73.77 (9.66)       | 69.64 (9.65)       |
| Pulse pressure, mmHg              | 63.31 (16.53)      | 64.74 (16.28)      |
| Current Smoker, N (%)             | 15 (5)             | 6 (2)              |
| DSST, points                      | 42.54 (12.59)      | 38.50 (12.66)      |
| MMSE, points                      | 92.45 (6.24)       | 92.94 (8.29)       |
| Diabetes, N (%)                   | 36 (12)            | 83 (29)            |
| Cardiovascular diseases, N (%)    | 49 (14)            | 83 (27)            |
| Stroke, N (%)                     | 12 (4)             | 24 (8)             |
| Hypertension, N (%)               | 146 (48)           | 211 (70)           |
| WMH volume, cm <sup>3</sup>       |                    | 6.00 (7.00)        |
| Atrophy, cm <sup>3</sup>          |                    | 0.91 (1.41)        |
| Fractional anisotropy             |                    | 0.357 (0.014)      |

Table S2. Population characteristics of the parent cohort (N=1455) measured at study entry in 1997-98 and at follow-up in 2006-07. Means and standard deviations (SD) are reported, unless otherwise noted.

| Population Characteristics     | Study entry<br>1997-98 |          | Follow-up visit<br>in 2006-07 |                    |
|--------------------------------|------------------------|----------|-------------------------------|--------------------|
|                                | Mean                   | SD       | Mean                          | SD                 |
| PWV, cm/sec                    | 902.76                 | (393.77) |                               |                    |
| BMI, m/kg <sup>2</sup>         | 27.7                   | (4.8)    | 27.6                          | (4.7)              |
| SBP, mmHg                      | 138.7                  | (21.1)   | 134.6                         | (20.5)             |
| DBP, mmHg                      | 74.3                   | (10.5)   | 69.2                          | (10.4)             |
| Pulse pressure, mmHg           | 64.5                   | (17.3)   | 65.4                          | (17.5)             |
| Current Smoker, N (%)          | 147                    | (10.1)   | 28                            | (3)                |
| DSST, points                   | 37.8                   | (13.8)   | 35.9                          | (13.4)             |
| MMSE, points                   | 90.6                   | (7.5)    | 91.2                          | (8.6)              |
| Diabetes, N (%)                | 215                    | (15)     | 412                           | (28) <sup>^</sup>  |
| Cardiovascular diseases, N (%) | 410                    | (28)     | 534                           | (37)               |
| Stroke, N (%)                  | 129                    | (10)     | 171                           | (12)               |
| Hypertension, N (%)            | 955                    | (67)     | 91                            | (93) <sup>\$</sup> |

<sup>^</sup>N=325 missing; <sup>\$</sup>n=178 missing.

Table S3. Mean, 25<sup>th</sup> and 75<sup>th</sup> percentile of white matter hyperintensities volume for each tract of interest.

|                                  |           | <b>Median, cm<sup>3</sup></b> | <b>25<sup>th</sup> - 75<sup>th</sup> percentile cm<sup>3</sup></b> |
|----------------------------------|-----------|-------------------------------|--------------------------------------------------------------------|
| Superior Longitudinal Fasciculus | Left      | 0.001                         | 0 -.014                                                            |
|                                  | Right     | 0.001                         | 0 -.024                                                            |
| Anterior thalamic radiation      | Left      | 0.033                         | .014-.071                                                          |
|                                  | Right     | 0.060                         | .027-.120                                                          |
| Cortico- spinal tracts           | Left      | 0.001                         | 0 -.006                                                            |
|                                  | Right     | 0.001                         | 0 -.012                                                            |
| Inferior Longitudinal Fasciculus | Left      | 0.005                         | 0-.026                                                             |
|                                  | Right     | 0.002                         | 0 -.009                                                            |
| Uncinate Fasciculus              | Left      | 0.008                         | .002-.017                                                          |
|                                  | Right     | 0.012                         | .003 -.031                                                         |
| Cingulum <sup>^</sup>            | Left      | 0.003                         | 0 - .130                                                           |
|                                  | Right     | 0                             | 0- .008                                                            |
| Corpus Callosum                  | Frontal   | .032                          | .014,.069                                                          |
|                                  | Occipital | .017                          | .001, .082                                                         |

<sup>^</sup> Upper and lower portions of the Cingulum are reported combined.

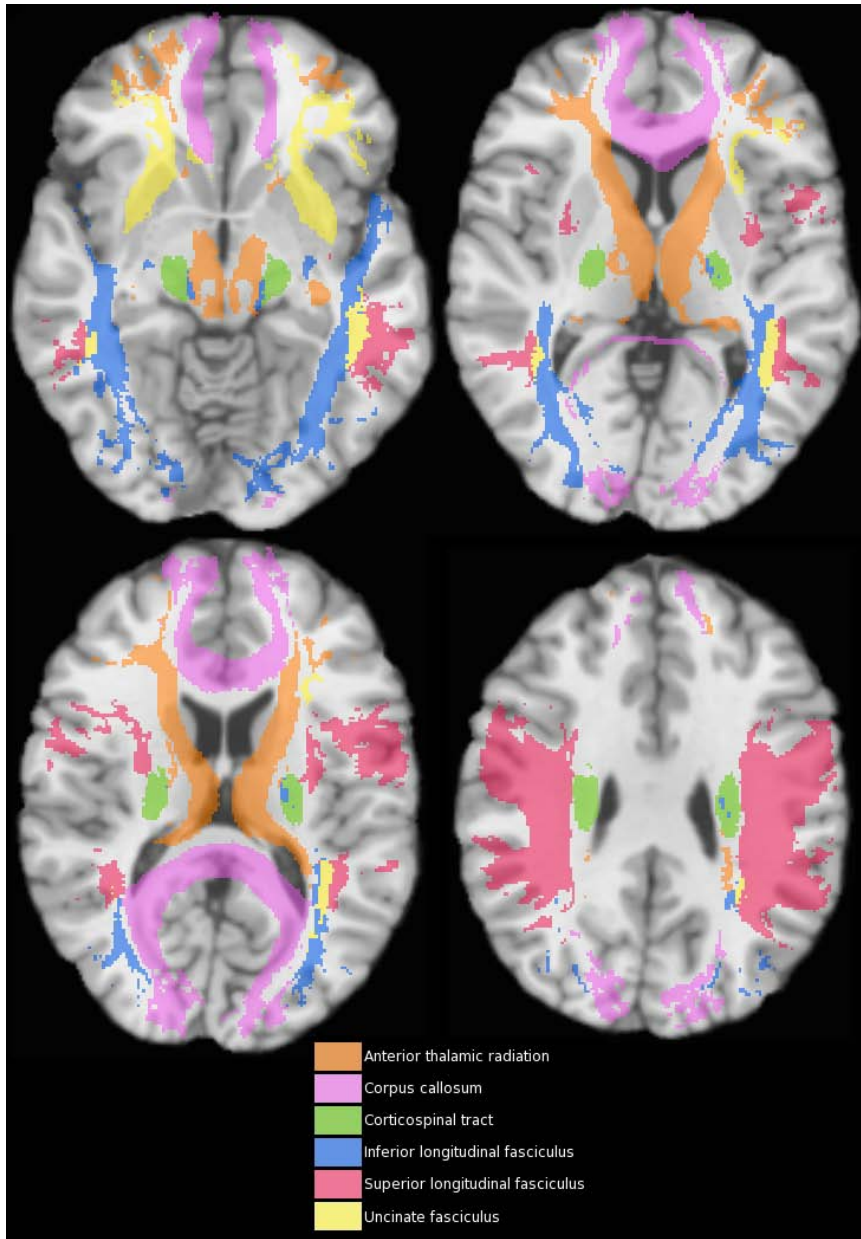

Figure S1.

### Figure Legend

Figure S1. Axial views of white matter tracts of interest are illustrated in color overlays on a T1-weighted MPRAGE in standard space (Montreal Neuroimaging Initiative).
